# Supplementary material for: A sensitive dopamine biosensor based on ultra-thin polypyrrole nanosheets decorated with Pt nanoparticles
Source: Royal Society of Chemistry journal article supplement (doi:10.1039/c5ra03521j), 2015-01-01
Supplement: c5ra03521j1.pdf [file c5ra03521j1.pdf]

### Supporting information

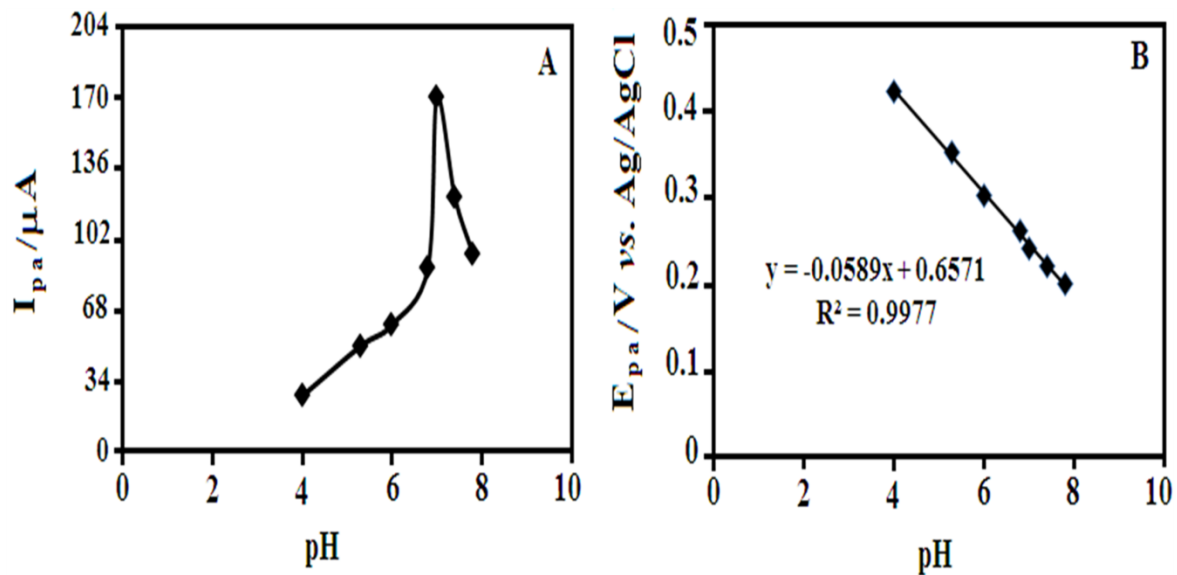

**Fig. S1.** Effect of pH on the (A) anodic peak currents and (B) anodic peak potential.

**Table S1.** The  $R_s$ ,  $R_{ct}$ ,  $Q$  and  $W$  values from equivalent circuit fitting of the electrochemical impedance plots.

| <b>Electrode</b> | <b><math>R_s</math> (<math>\Omega</math>)</b> | <b><math>R_{ct}</math> (<math>\Omega</math>)</b> | <b><math>Q</math> (<math>\mu\text{Mho}</math>)</b> | <b><math>W</math> (<math>\mu\text{Mho}</math>)</b> | <b><math>n</math></b> |
|------------------|-----------------------------------------------|--------------------------------------------------|----------------------------------------------------|----------------------------------------------------|-----------------------|
| Bare             | 173.34                                        | 7517.4                                           | 3.85E-06                                           | 9.97E-05                                           | 0.761                 |
| Ultrappy-GCE     | 180                                           | 2236.5                                           | 8.65E-06                                           | 6.88E-05                                           | 0.811                 |
| Pt NPs-GCE       | 184.48                                        | 936.87                                           | 4.9931E-05                                         | 5.51E-03                                           | 0.879                 |
| Pt/Ultrappy-GCE  | 190.93                                        | 476.02                                           | 8.02E-04                                           | 3.34E-04                                           | 0.794                 |

Scheme 1

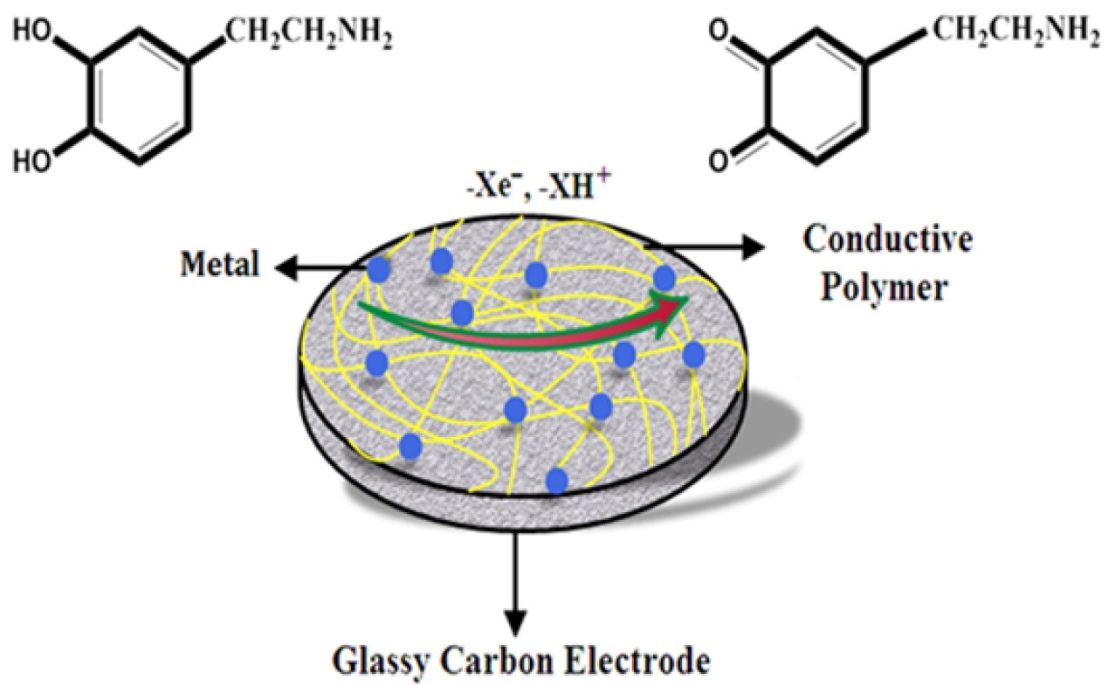

**Table S2.** Determination of DA in DA hydrochloride injection.

| <b>Sample</b> | <b>Content<br/>(<math>\mu\text{M}</math>)</b> | <b>Added (<math>\mu\text{M}</math>)</b> | <b>Found (<math>\mu\text{M}</math>)</b> | <b>RSD %</b> | <b>Recovery<br/>(%)</b> |
|---------------|-----------------------------------------------|-----------------------------------------|-----------------------------------------|--------------|-------------------------|
| 1             | 100.57                                        | 0                                       | 100.50                                  | 1.31         | 99.93                   |
| 2             | 100.57                                        | 10                                      | 110.24                                  | 1.25         | 99.70                   |
| 3             | 100.57                                        | 20                                      | 119.69                                  | 1.24         | 99.27                   |
